# Supplementary material
Source: Springer Nature journal article supplement (https://www.springermedizin.de/resource/supplementary/13000_2009_221_MOESM3_ESM.pdf/9624100)

Donor 1

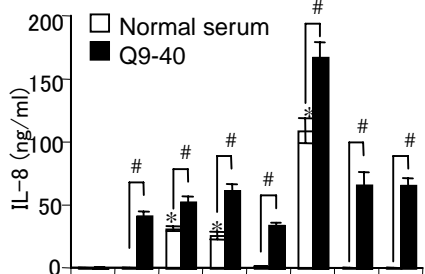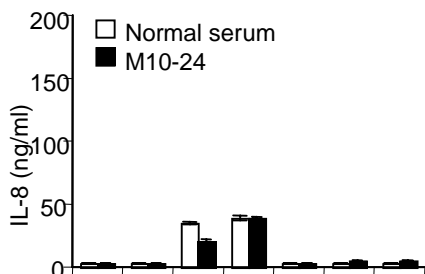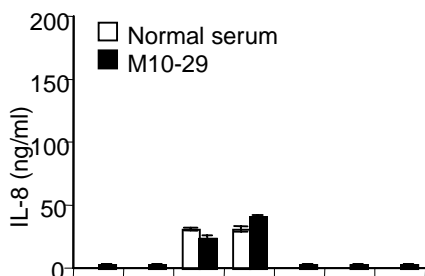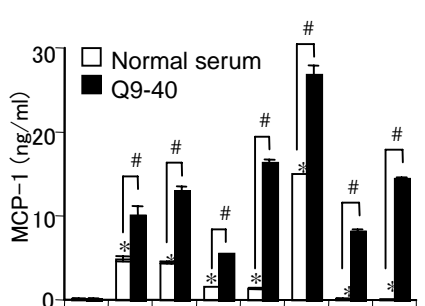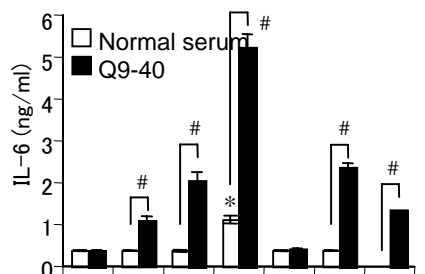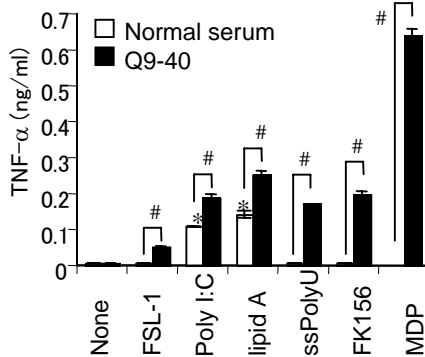

Donor 2 #

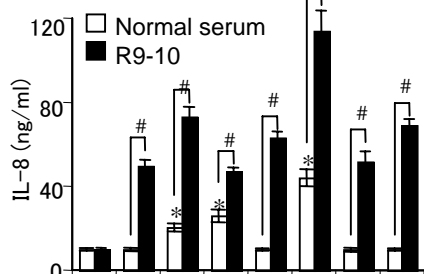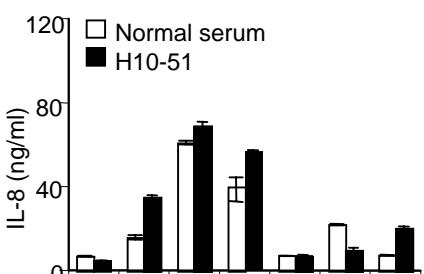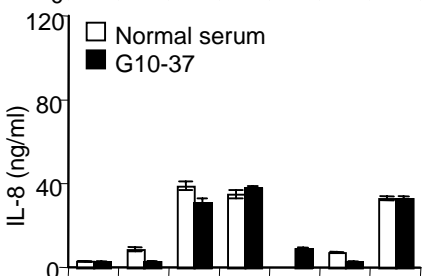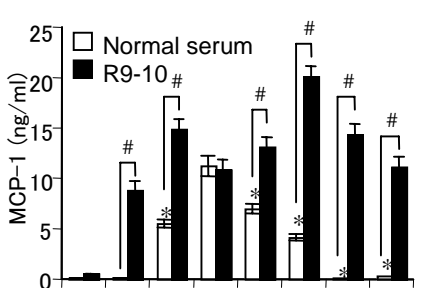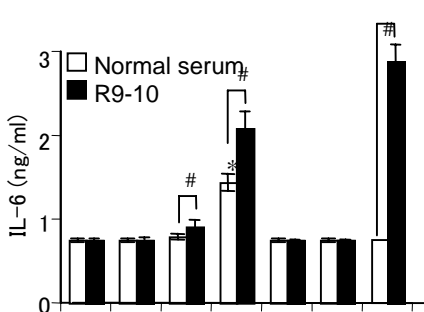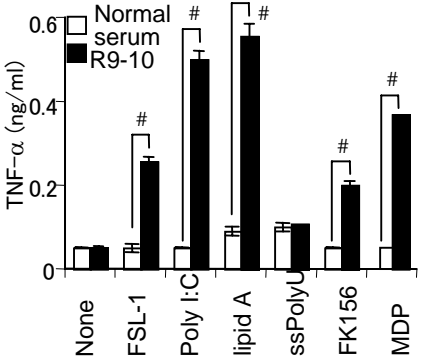

Supplement: MOESM3 [file 9624100]
